# Supplementary material
Source: HighWire-hosted journal article supplement (https://bmjopen.bmj.com/content/14/3/e084412)
Supplement: inline-supplementary-material-1 [file inline-supplementary-material-1.pdf]

**Supplementary File 1. Question route for interviews****Patient Question Route – Semi-Structured interviews; based on relevant Conceptual Framework for Implementation Outcomes<sup>1</sup>***Italics: Question prompts*

| Construct/Outcome                                                                                               | Questions                                                                                                                                                                                                                                                                                                                                                                                                                |
|-----------------------------------------------------------------------------------------------------------------|--------------------------------------------------------------------------------------------------------------------------------------------------------------------------------------------------------------------------------------------------------------------------------------------------------------------------------------------------------------------------------------------------------------------------|
| How an individual feels about taking part in an intervention                                                    | How did you feel about taking part in <i>PCEssentials</i> ? <ul style="list-style-type: none"> <li><i>When you first heard about it</i></li> <li><i>While you were taking part</i></li> </ul>                                                                                                                                                                                                                            |
| The extent to which the participant understands the intervention, and how the intervention works                | How would you describe what <i>PCEssentials</i> was about?                                                                                                                                                                                                                                                                                                                                                               |
| The participant's confidence that they can perform the behaviour(s) required to participate in the intervention | How confident were you that you could do what you needed to take part in <i>PCEssentials</i> ? <ul style="list-style-type: none"> <li><i>Access and use resources</i></li> <li><i>Contact the intervention nurse</i></li> <li><i>Complete the homework</i></li> </ul>                                                                                                                                                    |
| The perceived amount of effort that is required to participate in the intervention                              | Do you think <i>PCEssentials</i> is easier or harder than coming to the hospital/clinic for care? <ul style="list-style-type: none"> <li><i>In what way is it easier/harder?</i></li> </ul>                                                                                                                                                                                                                              |
| The extent to which benefits, profits, or values must be given up to engage in an intervention                  | Did you feel you had to give anything up/miss out on anything to take part in <i>PCEssentials</i> ? (out of pocket expenses, quality of care) <ul style="list-style-type: none"> <li><i>Can you give some examples?</i></li> <li><i>Do you think the quality of care you received/costs was the same as coming to the hospital/clinic for care?</i></li> </ul>                                                           |
| The extent to which the intervention has good fit with an individual's value system                             | Does this type of virtual care meet your needs? <ul style="list-style-type: none"> <li><i>Why or why not?</i></li> <li><i>What could be changed to meet your needs?</i></li> <li><i>What was it that really helped meet your needs?</i></li> </ul>                                                                                                                                                                       |
| The extent to which the intervention is perceived as likely to achieve its purpose                              | Looking back at <i>PCEssentials</i> since you started, how effective do you think it is overall? <ul style="list-style-type: none"> <li><i>In what way is it effective/not effective?</i></li> </ul> Can you give me an example of something you really liked/disliked about <i>PCEssentials</i> ?<br>How could <i>PCEssentials</i> be improved?<br>Is there anything else you wanted to say about <i>PCEssentials</i> ? |

### Clinical Stakeholder Question Route – Semi-Structured interviews; based on relevant Conceptual Framework for Implementation Outcomes<sup>1</sup>

*Italics: Question prompts*

| Construct/Outcome                                                                                                     | Questions                                                                                                                                                                                                                                                                                                                                                                                                                                                                                                                              |
|-----------------------------------------------------------------------------------------------------------------------|----------------------------------------------------------------------------------------------------------------------------------------------------------------------------------------------------------------------------------------------------------------------------------------------------------------------------------------------------------------------------------------------------------------------------------------------------------------------------------------------------------------------------------------|
| How an individual feels about conducting/taking part in an intervention                                               | <p>What were your thoughts about the <i>PCEssentials</i> study?</p> <ul style="list-style-type: none"> <li><i>When you first heard about it</i></li> <li><i>While you were recruiting</i></li> </ul>                                                                                                                                                                                                                                                                                                                                   |
| The extent to which the participant understands the intervention, and how the intervention works                      | <p>What is your understanding about how <i>PCEssentials</i> works?</p>                                                                                                                                                                                                                                                                                                                                                                                                                                                                 |
| The participant's confidence that they can perform the behaviour(s) required to deliver/take part in the intervention | <p>How confident were you that you could do what you needed to deliver/take part in <i>PCEssentials</i>?</p> <ul style="list-style-type: none"> <li><i>Recruitment</i></li> <li><i>Conducting the intervention sessions</i></li> <li><i>Identifying triggers for care escalation/managing deterioration</i></li> </ul>                                                                                                                                                                                                                 |
| The perceived amount of effort that is required to deliver/take part in the intervention                              | <p>How burdensome is <i>PCEssentials</i> to deliver/take part in compared to usual care?</p> <ul style="list-style-type: none"> <li><i>In what way is it less/more burdensome?</i></li> </ul>                                                                                                                                                                                                                                                                                                                                          |
| The extent to which benefits, profits, or values must be given up to deliver/take part in an intervention             | <p>As a clinician do you feel you had to give anything up to deliver/take part in <i>PCEssentials</i>?</p> <ul style="list-style-type: none"> <li><i>Can you give some examples?</i></li> </ul> <p>Do you think the quality of care delivered in <i>PCEssentials</i> differs from usual care?</p> <ul style="list-style-type: none"> <li><i>Can you give some examples?</i></li> </ul> <p>From a cost perspective to your service, are there any advantages/disadvantages to the <i>PCEssentials</i> model compared to usual care?</p> |
| The extent to which the intervention has good fit with an individual's value system                                   | <p>Does <i>PCEssentials</i> meet your needs as a clinician?</p> <ul style="list-style-type: none"> <li><i>Why or why not?</i></li> <li><i>What could be changed to meet your needs?</i></li> <li><i>What was it that helped meet your needs?</i></li> </ul>                                                                                                                                                                                                                                                                            |
| The extent to which the intervention is perceived as likely to achieve its purpose                                    | <p>Looking back at the program since it started, how effective do you think <i>PCEssentials</i> is overall?</p> <ul style="list-style-type: none"> <li><i>In what way is it effective/not effective?</i></li> <li><i>Clinician perspective</i></li> <li><i>Patient needs</i></li> </ul>                                                                                                                                                                                                                                                |

|  |                                                                                                                                                                                                                                  |
|--|----------------------------------------------------------------------------------------------------------------------------------------------------------------------------------------------------------------------------------|
|  | <p>Can you give me an example of something you really liked/disliked about <i>PCEssentials</i>?</p> <p>How could <i>PCEssentials</i> be improved?</p> <p>Is there anything else you wanted to say about <i>PCEssentials</i>?</p> |
|--|----------------------------------------------------------------------------------------------------------------------------------------------------------------------------------------------------------------------------------|

1. Proctor E, Silmere H, Raghavan R, Hovmand P, Aarons G, Bunger A, et al. Outcomes for implementation research: conceptual distinctions, measurement challenges, and research agenda. *Administration and policy in mental health*. 2011;38(2):65-76.
